# Supplementary material
Source: PubMed Central journal article supplement (PMC2094128)
Supplement: NIHMS30187-supplement-01.pdf [file NIHMS30187-supplement-01.pdf]

## SUPPLEMENTAL DATA

### A ‘Molecular Brake’ in the Kinase Hinge Region Regulates the Activity of Receptor Tyrosine Kinases

Huaibin Chen, Jinghong Ma, Wanqing Li, Anna V. Eliseenkova, Chongfeng Xu, Thomas A. Neubert, W. Todd Miller, and Moosa Mohammadi

#### Figure Legends

**Figure S1.** Sequence alignment of the intracellular domains of human FGFR1 to 4 based on the crystal structures of unphosphorylated and A-loop tyrosine phosphorylated wild-type FGFR2K. Secondary structures were assigned using PROCHECK (Laskowski et al., 1993), and are shown above the sequence alignment. Blue and red bars denote strands and helices, respectively. For comparison, the secondary structure assignments for the unphosphorylated wild-type structure appear on top of those for A-loop tyrosine phosphorylated wild-type structure. The location of the residues at which pathogenic mutations in FGFR2 and FGFR3 occurs are colored green. The A-loop twin tyrosine phosphorylation sites are colored orange. The sequences and secondary structures of phosphorylated IRK and IGF1RK are also shown. The A-loop, kinase hinge and kinase insert are highlighted with green, yellow and black boxes, respectively.

**Figure S2.** (A) Stereo view of the C $\alpha$  traces of unphosphorylated (in orange) and A-loop tyrosine phosphorylated (in green) wild-type FGFR2K structures following the superimposition of the C-lobes. The diverging and converging points of the A-loops are denoted by arrow heads. (B) The  $\alpha$ C helix in FGFR2 kinase does not shift independently of the other secondary structure elements of the N-lobe upon activation. unphosphorylated (in gray) and A-loop tyrosine phosphorylated (in green) wild-type FGFR2K structures following superimposition of the N-lobes are shown in cartoon (in two views). (C) The salt bridge between K517 in the  $\beta$ 3 strand and E534 in the  $\alpha$ C helix is already taking place in the unphosphorylated wild-type FGFR2K structure.

**Figure S3.** All FGFR2K pathogenic mutations disengage the molecular brake at the kinase hinge region and cause an inward rotation of the N-lobe towards the C-lobe. (A) Comparison of the disposition of the kinase N-lobes in wild-type (either unphosphorylated and A-loop tyrosine phosphorylated) and different unphosphorylated mutant FGFR2K structures following superimposition of the C-lobes (not shown for clarity). The pivot point, located between I548 and N549, is indicated by an arrow. To better illustrate the N-lobe rotation, a close-up view of the N-terminal segment of the  $\alpha$ C helix is shown in the inset. (B) Representation of the hydrogen bonding between D530 in the  $\alpha$ C helix and R664 in the A-loop, as exemplified by the E565G mutant FGFR2K structure (in green). Note that this hydrogen bonding does not occur in the unphosphorylated wild-type FGFR2K structure (in wheat).

**Figure S4.** Positive ((**A**) to (**D**)) and negative ion ((**E**)) MALDI Q-TOF mass spectra of methyl-esterified tryptic digests of FGFR2K wild-type and mutant kinases. (**A**) N549H mutant FGFR2K; (**B**) R678G mutant FGFR2K; (**C**) unphosphorylated wild-type FGFR2K; (**D**) and (**E**) A-loop phosphorylated wild-type FGFR2K. The A-loop peptide, DINNIDYYKK (theoretical monoisotopic MW=1284.64 before methyl esterification and 1326.68 after methyl esterification), with 0 to 2 tyrosine phosphorylations, are labeled with (#), (\*), (\*\*), respectively. Methyl ester side products of deamidated Asn (N) residues are labeled (+15). Methyl esterification was performed to increase the selectivity for the detection of phosphopeptides (Xu et al., 2005). (**F**) shows the MS spectrum of the A-loop peptide with 1 or 2 tyrosine phosphorylations (calculated  $MH^+$  1365.61 and 1385.58, respectively) from a tryptic digest of dissolved crystal after enrichment for phosphopeptides using  $TiO_2$  chromatography. (**G**) shows the MS/MS spectrum of the monophosphorylated peptide at  $MH^+$  1365.61.

**Figure S5.** Stereo view of the molecular brake at the kinase hinge region of unphosphorylated and phosphorylated wild-type and 7 unphosphorylated mutant FGFR2Ks with the  $2F_O-F_C$  electron density map contoured at  $1\sigma$  around the hinge region. Coloring scheme is as in **Fig. 3**.

**Figure S6.** Evaluation of the conformational changes between the unphosphorylated wild-type FGFR2K structure and the phosphorylated wild-type and 7 unphosphorylated mutant FGFR2K structures using difference distance matrix plot (DDMP) program. The two regions with greatest conformational changes are denoted by red and cyan bars.

**Table S1. Kinetic properties of wild-type and mutant FGFR2Ks**

1. Variable substrate = RTK peptide (KKEEEEYMMMMG)

| <b>Protein</b> | <b>K<sub>m, peptide</sub> (μM)</b> | <b>V<sub>max</sub> (nmol/min/mg)</b> | <b>k<sub>cat</sub>/K<sub>m</sub> (min<sup>-1</sup> mM<sup>-1</sup>)</b> |
|----------------|------------------------------------|--------------------------------------|-------------------------------------------------------------------------|
| WT             | 450 ± 60                           | 350 ± 16                             | 28                                                                      |
| K659N          | 980 ± 100                          | 4140 ± 170                           | 157                                                                     |
| E565A          | 1030 ± 100                         | 16450 ± 840                          | 595                                                                     |

2. Variable substrate = STAT1 peptide (GPKGTGYIKTELISVSG)

| <b>Protein</b> | <b>K<sub>m, peptide</sub> (μM)</b> | <b>V<sub>max</sub> (nmol/min/mg)</b> | <b>k<sub>cat</sub>/K<sub>m</sub> (min<sup>-1</sup> mM<sup>-1</sup>)</b> |
|----------------|------------------------------------|--------------------------------------|-------------------------------------------------------------------------|
| WT             | 620 ± 180                          | 450 ± 60                             | 27                                                                      |
| K659N          | 460 ± 160                          | 10230 ± 1220                         | 828                                                                     |
| E565A          | 430 ± 170                          | 7930 ± 140                           | 686                                                                     |

3. Variable substrate = ATP

| <b>Protein</b> | <b>K<sub>m, ATP</sub> (μM)</b> | <b>V<sub>max</sub> (nmol/min/mg)</b> | <b>k<sub>cat</sub>/K<sub>m</sub> (min<sup>-1</sup> mM<sup>-1</sup>)</b> |
|----------------|--------------------------------|--------------------------------------|-------------------------------------------------------------------------|
| WT             | 840 ± 140                      | 480 ± 30                             | 21                                                                      |
| K659N          | 1540 ± 110                     | 4920 ± 320                           | 119                                                                     |
| E565A          | 300 ± 60                       | 4580 ± 300                           | 571                                                                     |

**Table S2. Data Collection and Refinement Statistics**

| <b>Construct</b>                                                                                                                                                                                                       | Unphos. WT                         | Phos. WT                                      | N549H                             | N549T                              | E565G                              |
|------------------------------------------------------------------------------------------------------------------------------------------------------------------------------------------------------------------------|------------------------------------|-----------------------------------------------|-----------------------------------|------------------------------------|------------------------------------|
| <b>Data Collection</b>                                                                                                                                                                                                 |                                    |                                               |                                   |                                    |                                    |
| Resolution (Å)                                                                                                                                                                                                         | 50-2.4<br>(2.49-2.4)               | 50-1.8<br>(1.86-1.8)                          | 50-2.4<br>(2.49-2.4)              | 50-2.4<br>(2.49-2.4)               | 50-2.3<br>(2.38-2.3)               |
| Space group                                                                                                                                                                                                            | P2 <sub>1</sub> 2 <sub>1</sub> 2   | P2 <sub>1</sub> 2 <sub>1</sub> 2 <sub>1</sub> | P2 <sub>1</sub> 2 <sub>1</sub> 2  | P2 <sub>1</sub> 2 <sub>1</sub> 2   | P2 <sub>1</sub> 2 <sub>1</sub> 2   |
| Unit Cell Parameters<br>(Å, °)                                                                                                                                                                                         | a=106.610<br>b=118.605<br>c=63.124 | a=56.353<br>b=78.436<br>c=84.839              | a=105.521<br>b=117.50<br>c=63.174 | a=105.043<br>b=114.474<br>c=64.347 | a=104.897<br>b=114.748<br>c=64.440 |
| Content of the<br>asymmetric unit                                                                                                                                                                                      | 2                                  | 1                                             | 2                                 | 2                                  | 2                                  |
| Measured reflections (#)                                                                                                                                                                                               | 221513                             | 182181                                        | 303612                            | 185633                             | 187739                             |
| Unique Reflections (#)                                                                                                                                                                                                 | 31998 (3117)                       | 35199 (3478)                                  | 30784 (2993)                      | 29605 (2631)                       | 34867 (3243)                       |
| Data redundancy                                                                                                                                                                                                        | 6.9 (5.8)                          | 5.2 (5.1)                                     | 9.9 (8.8)                         | 6.3 (5.6)                          | 5.4 (3.8)                          |
| Data completeness (%)                                                                                                                                                                                                  | 99.6 (98.4)                        | 98.6 (98.6)                                   | 99.3 (98.3)                       | 95.0 (86.1)                        | 99.1 (93.8)                        |
| R <sub>sym</sub> (%)                                                                                                                                                                                                   | 10.2 (34.8)                        | 4.6 (26.7)                                    | 6.5 (23.3)                        | 7.2 (25.6)                         | 6.4 (22.6)                         |
| I/sig                                                                                                                                                                                                                  | 12.7                               | 30.9                                          | 15.2                              | 18.5                               | 20.3                               |
| <b>Refinement</b>                                                                                                                                                                                                      |                                    |                                               |                                   |                                    |                                    |
| R factor/R free                                                                                                                                                                                                        | 21.1/25.8                          | 25.1/26.5                                     | 20.1/23.8                         | 21.4/25.4                          | 21.7/25.2                          |
| Number of protein atoms                                                                                                                                                                                                | 4517                               | 2318                                          | 4465                              | 4440                               | 4440                               |
| Number of non-<br>protein/solvent atoms                                                                                                                                                                                | 20                                 | 33                                            | 74                                | 86                                 | 86                                 |
| Number of solvent atoms                                                                                                                                                                                                | 188                                | 119                                           | 133                               | 160                                | 172                                |
| Rmsd bond length (Å)                                                                                                                                                                                                   | 0.006                              | 0.006                                         | 0.006                             | 0.00                               | 0.006                              |
| Rmsd bond angle (°)                                                                                                                                                                                                    | 1.2                                | 1.3                                           | 1.3                               | 1.3                                | 1.3                                |
| Rmsd B factor (Å <sup>2</sup> )                                                                                                                                                                                        | 2.1                                | 1.2                                           | 1.2                               | 1.9                                | 1.1                                |
| <b>PDB ID</b>                                                                                                                                                                                                          | 2PSQ                               | 2PVF                                          | 2PWL                              | 2PZ5                               | 2PY3                               |
| <sup>a</sup> Numbers in parenthesis refer to the highest resolution shell.                                                                                                                                             |                                    |                                               |                                   |                                    |                                    |
| <sup>b</sup> R <sub>sym</sub> = $\sum  I - \langle I \rangle  / \sum I$ , where I is the observed intensity of a reflection, and $\langle I \rangle$ is the average intensity of all the symmetry related reflections. |                                    |                                               |                                   |                                    |                                    |

**Table S2. Data Collection and Refinement Statistics (cont.)**

| <b>Construct</b>                                                                                                                                                                                                                                                                                     | E565A                            | K641R                            | K526E                            | K659N        |
|------------------------------------------------------------------------------------------------------------------------------------------------------------------------------------------------------------------------------------------------------------------------------------------------------|----------------------------------|----------------------------------|----------------------------------|--------------|
| <b>Data Collection</b>                                                                                                                                                                                                                                                                               |                                  |                                  |                                  |              |
| Resolution (Å)                                                                                                                                                                                                                                                                                       | 50-2.9                           | 50-3.0                           | 50-2.4                           | 50-2.2       |
|                                                                                                                                                                                                                                                                                                      | (3.0-2.9)                        | (3.11-3.0)                       | (2.49-2.4)                       | (2.28-2.2)   |
| Space group                                                                                                                                                                                                                                                                                          | P2 <sub>1</sub> 2 <sub>1</sub> 2 | P2 <sub>1</sub> 2 <sub>1</sub> 2 | P2 <sub>1</sub> 2 <sub>1</sub> 2 | P1           |
| Unit Cell Parameters                                                                                                                                                                                                                                                                                 | a=105.569                        | a=106.137                        | a=105.410                        | a=70.581     |
| (Å, °)                                                                                                                                                                                                                                                                                               | b=116.824                        | b=116.642                        | b=114.021                        | b=70.467     |
|                                                                                                                                                                                                                                                                                                      | c=63.942                         | c=63.636                         | c=64.392                         | c=85.690     |
|                                                                                                                                                                                                                                                                                                      |                                  |                                  |                                  | α=92.185     |
|                                                                                                                                                                                                                                                                                                      |                                  |                                  |                                  | β=112.305    |
|                                                                                                                                                                                                                                                                                                      |                                  |                                  |                                  | γ=116.187    |
| Content of the asymmetric unit                                                                                                                                                                                                                                                                       | 2                                | 2                                | 2                                | 4            |
| Measured reflections (#)                                                                                                                                                                                                                                                                             | 116167                           | 115823                           | 187454                           | 155806       |
| Unique Reflections (#)                                                                                                                                                                                                                                                                               | 17986 (1699)                     | 16398 (1606)                     | 29906 (2796)                     | 65751 (6369) |
| Data redundancy                                                                                                                                                                                                                                                                                      | 6.5 (5.7)                        | 7.1 (7.2)                        | 6.3 (5.6)                        | 2.4 (1.9)    |
| Data completeness (%)                                                                                                                                                                                                                                                                                | 99.4 (97.4)                      | 100 (100)                        | 96.5 (92.2)                      | 97.7 (95.3)  |
| R <sub>sym</sub> (%)                                                                                                                                                                                                                                                                                 | 15.9 (50.6)                      | 11.7 (31.4)                      | 7.1 (25.2)                       | 4.0 (13.1)   |
| I/sig                                                                                                                                                                                                                                                                                                | 8.2                              | 11.4                             | 17.8                             | 30.3         |
| <b>Refinement</b>                                                                                                                                                                                                                                                                                    |                                  |                                  |                                  |              |
| R factor/R free                                                                                                                                                                                                                                                                                      | 20.2/25.2                        | 20.1/26.8                        | 21.4/25.1                        | 24.4/28.1    |
| Number of protein atoms                                                                                                                                                                                                                                                                              | 4415                             | 4417                             | 4434                             | 8919         |
| Number of non-protein/solvent atoms                                                                                                                                                                                                                                                                  | 40                               | 40                               | 86                               | 88           |
| Number of solvent atoms                                                                                                                                                                                                                                                                              | 60                               | 49                               | 147                              | 163          |
| Rmsd bond length (Å)                                                                                                                                                                                                                                                                                 | 0.007                            | 0.007                            | 0.006                            | 0.008        |
| Rmsd bond angle (°)                                                                                                                                                                                                                                                                                  | 1.3                              | 1.3                              | 1.3                              | 1.3          |
| Rmsd B factor (Å <sup>2</sup> )                                                                                                                                                                                                                                                                      | 2.2                              | 2.2                              | 1.8                              | 1.1          |
| <b>PDB ID</b>                                                                                                                                                                                                                                                                                        | 2Q08                             | 2PZR                             | 2PZP                             | 2PVY         |
| <sup>a</sup> Numbers in parenthesis refer to the highest resolution shell.<br><sup>b</sup> R <sub>sym</sub> = $\sum  I - \langle I \rangle  / \sum I$ , where I is the observed intensity of a reflection, and $\langle I \rangle$ is the average intensity of all the symmetry related reflections. |                                  |                                  |                                  |              |

**Table S3. N-lobe rotation and the A-loop conformation of wild-type and mutant FGFR2Ks**

|                            | Unphos.WT | Phos. WT | N549H    | N549T    | E565G    | E565A    | K641R    | K526E    | K659N  |
|----------------------------|-----------|----------|----------|----------|----------|----------|----------|----------|--------|
| <i>N-lobe rotation*</i>    | -         | 6.7°     | 4.2°     | 7.0°     | 6.8°     | 5.7°     | 5.2°     | 6.5°     | 5.6    |
| <i>A-loop conformation</i> | Inactive  | Active   | Inactive | Inactive | Inactive | Inactive | Inactive | Inactive | Active |

\*The degrees of N-lobe rotation were calculated using program lsqkab from CCP4 suite. First, the C-lobe of phosphorylated wild-type or different mutant FGFR2 kinases were superimposed onto that of unphosphorylated wild-type FGFR2 kinase (reference structure). Thereafter, the N-lobes of transformed phosphorylated wild-type or the transformed mutant FGFR2K structures were superimposed onto that of unphosphorylated wild-type FGFR2K structure.

F) Supplemental Figure 1

|        |             |             |               |              |              |             |             |             |      |
|--------|-------------|-------------|---------------|--------------|--------------|-------------|-------------|-------------|------|
| fgfr2k | M           | KNTTKKPDFS  | SQPAVHKLTAK   | RIPLRROQVTV  | SAEASSSMNS   | NTPLVRIITTR | LSSSTADTPML | 460         |      |
| fgfr1k | M           | KSGTKKSDFH  | SQMAVHKLAG    | SIPLRROQVTV  | SADSSASMNS   | GVLVLR-PSR  | LSS-SGTPML  | 457         |      |
| fgfr3k | L           | RSPPKGL--   | GSPVHKIS-     | RIFPLKRQVSL  | ESNAS--MS    | NTPLVRI-AAR | LSS-GEPTL   | 451         |      |
| fgfr4k | G           | QALHGRHP-R  | PPATVQKLS-    | RFPALARQFSL  | ESGSSG--KS   | SSSLVLR-GVR | LSS-SGPALL  | 446         |      |
| irk    |             |             |               |              |              |             |             | 977         |      |
| igflrk |             |             |               |              |              |             |             | 985         |      |
|        |             | $\beta 0$   | $\beta 1$     | $\beta 2$    | $\beta 3$    |             |             |             |      |
| fgfr2k | AGVSEYELPE  | DPKWEFPRDK  | LTLGKPLGEG    | CFGQVVMAEA   | VGIDKDKPKKE  | AVTVAVKMLK  | DDATEKDLSD  | 530         |      |
| fgfr1k | AGVSEYELPE  | DPRWELPRDR  | LVLGKPLGEG    | CFGQVVMAEA   | IGLDKDKPNR   | VTKVAVKMLK  | SDATEKDLSD  | 527         |      |
| fgfr3k | ANVSELELPA  | DPKWELSRAR  | LTLGKPLGEG    | CFGQVVMAEA   | IGIDKDRRAAK  | PVTAVAVKMLK | DDATDKDLSD  | 521         |      |
| fgfr4k | AGLVSLDLPL  | DPLWELFPRDR | LVLGKPLGEG    | CFGQVVRAEA   | FGMDPARPDQ   | ASTVAVKMLK  | DNASDKDLAD  | 516         |      |
| irk    | VFPSCSVYV   | PDEWEVSRREK | ITTLRRELGGQ   | SFGMVYEGNA   | RDI I--KGEA  | ETRVAVKTVN  | ESASLRERIE  | 1043        |      |
| igflrk | VYV         | PDEWEVAREK  | ITMSRELGQG    | SFGMVYEGVA   | KGVV--KDEP   | ETRVAVIKTVN | EASMRERIE   | 1046        |      |
|        |             | $\alpha C$  | $\beta 4$     | $\beta 5$    | $\alpha D$   |             |             |             |      |
| fgfr2k | LVSEMEMMKM  | IGKHKNIINL  | LGA CTQDGPL   | YVIVEYASKG   | NLREYLRAARR  | P-----      | PGMEYSYDI   | 590         |      |
| fgfr1k | LISEMEMMKM  | IGKHKNIINL  | LGA CTQDGPL   | YVIVEYASKG   | NLREYLQARR   | P-----      | PGL EYCYNP  | 587         |      |
| fgfr3k | LVSEMEMMKM  | IGKHKNIINL  | LGA CTQGGPL   | YVIVEYAAKG   | NLREFLRARR   | P-----      | PGLDYSFDT   | 581         |      |
| fgfr4k | LVSEMEVMKL  | IGRHKNIINL  | LGVCTQEGPL    | YVIVECAAKG   | NLREFLRARR   | P-----      | PGPDLSPDG   | 576         |      |
| irk    | FLNEASVMKG  | F-TCHHVVR   | LGVVSKGQPT    | LVMELM AHG   | D LKSYLRS    | LR          | PEAENNPGRP  | 1103        |      |
| igflrk | FLNEASVMKE  | F-NCHHVVR   | LGVVSKGQPT    | LVMELM TRG   | D LKSYLRS    | LR          | PEMENNPVLA  | 1106        |      |
|        |             | $\alpha E$  | $\beta 6$     | $\beta 7$    | $\beta 8$    | $\beta 9$   |             |             |      |
| fgfr2k | NRVPEEQ---  | MTFKDLV     | SCTYQLARGM    | EYLASQKCIH   | RDLAARNVLV   | TENNVMKIAD  | FGLARDI NNI | 654         |      |
| fgfr1k | SHNPEEQ---  | LSFKDLV     | SCAYQVARGM    | EYLASQKCIH   | RDLAARNVLV   | TEDNVMKIAD  | FGLARDIHHI  | 651         |      |
| fgfr3k | CKPPEEQ---  | LTFKDLV     | SCAYQVARGM    | EYLASQKCIH   | RDLAARNVLV   | TEDNVMKIAD  | FGLARDVHNI  | 645         |      |
| fgfr4k | PRSSEGP---  | LSFPVLV     | SCAYQVARGM    | QYLESRKC I H | RDLAARNVLV   | TEDNVMKIAD  | FGLARGVHHI  | 640         |      |
| irk    | -----       | PT          | LQEMI         | QMAAEIADGM   | AYLNAKKFVH   | RDLAARNCMV  | AHDFTVKI GD | FGMT RDIYET | 1160 |
| igflrk | -----       | PS          | L SKMI        | QMAAEIADGM   | AYLNAK KFVH  | RDLAARNCMV  | AEDFTVKI GD | FGMT RDIYET | 1163 |
|        |             | $\beta 10$  | $\beta 11$    | $\alpha EF$  | $\beta 12$   | $\alpha F$  | $\alpha G$  |             |      |
| fgfr2k | DYYKKT TNGR | LPVKWMAPEA  | LFD R VY THQS | DVWSFGVLMW   | EIFTLGGSPY   | PGIPVEELFK  | LLKEGHRMDK  | 724         |      |
| fgfr1k | DYYKKT TNGR | LPVKWMAPEA  | LFD R IY THQS | DVWSFGVLLW   | EIFTLGGSPY   | PGVPVEELFK  | LLKEGHRMDK  | 721         |      |
| fgfr3k | DYYKKT TNGR | LPVKWMAPEA  | LFD R VY THQS | DVWSFGVLLW   | EIFTLGGSPY   | PGIPVEELFK  | LLKEGHRMDK  | 715         |      |
| fgfr4k | DYYKKT TNGR | LPVKWMAPEA  | LFD R VY THQS | DVWSFGVLLW   | EIFTLGGSPY   | PGIPVEELFS  | LLREGHRMDR  | 710         |      |
| irk    | DYYRKKGKGL  | LPVRWMAPE S | LKDGVFTTSS    | DMWSFGVVLW   | EITSLAEQPY   | QGLSNEQVLK  | FVMDGGYLDQ  | 1230        |      |
| igflrk | DYYRKKGKGL  | LPVRWMSPE S | LKDGVFTTYS    | DVWSFGVVLW   | EIATSLAEQPY  | QGLSNEQVLR  | FVMEGGLLDK  | 1233        |      |
|        |             | $\alpha H$  | $\alpha I$    | $\alpha J$   |              |             |             |             |      |
| fgfr2k | PANCTNELYM  | MMRDCWHA VP | SQRPTFKQLV    | EDLDRILT LT  | TNEEYLDLSQ   | PLEQYSPSPY  | DTR-SSSCSG  | 793         |      |
| fgfr1k | PSNCTNELYM  | MMRDCWHA VP | SQRPTFKQLV    | EDLDRIVALT   | SNQ EYLDLSM  | PLDQYSPSFP  | DTRSSSTCSG  | 791         |      |
| fgfr3k | PANCTHDLYM  | IMRECWHAAP  | SQRPTFKQLV    | EDLDRVLTVT   | STD EYLDLSA  | PFEQYSPGGQ  | DTP-SSSSSG  | 784         |      |
| fgfr4k | PPHCPEPELYG | LMRECWHAAP  | SQRPTFKQLV    | EALDKV L-LA  | VSE EYLDLRL  | TFGPYSPSGG  | DAS-SSTCSS  | 778         |      |
| irk    | PDNCPERVTD  | LMRMCWQFN P | KMRPTFL EIV   | NLLKDDLHP S  | FPEV SFFHSE  | ENK         |             | 1283        |      |
| igflrk | PDNCPDMLFE  | LMRMCWQYN P | KMRPSFLE I I  | SSI KEEMEPG  | FREV SFY YSE | ENK         |             | 1292        |      |
| fgfr2k | DDSVFSPDPM  | PYEPCLPQYP  | HI--NGS-VK    | T            |              |             |             | 821         |      |
| fgfr1k | EDSVFSHEPL  | PEEPCLPRHP  | AQLANGGLKR    | R            |              |             |             | 848         |      |
| fgfr3k | DDSVFAHDDL  | P-----PAPP  | SS-----GGS-R  | T            |              |             |             | 833         |      |
| fgfr4k | -DSVFSHDPL  | P--LGSSSFP  | F----GSGVQ    | T            |              |             |             | 802         |      |
| irk    |             |             |               |              |              |             |             | 1292        |      |
| igflrk |             |             |               |              |              |             |             | 1345        |      |

Chen et al.  
Figure S1



**A**

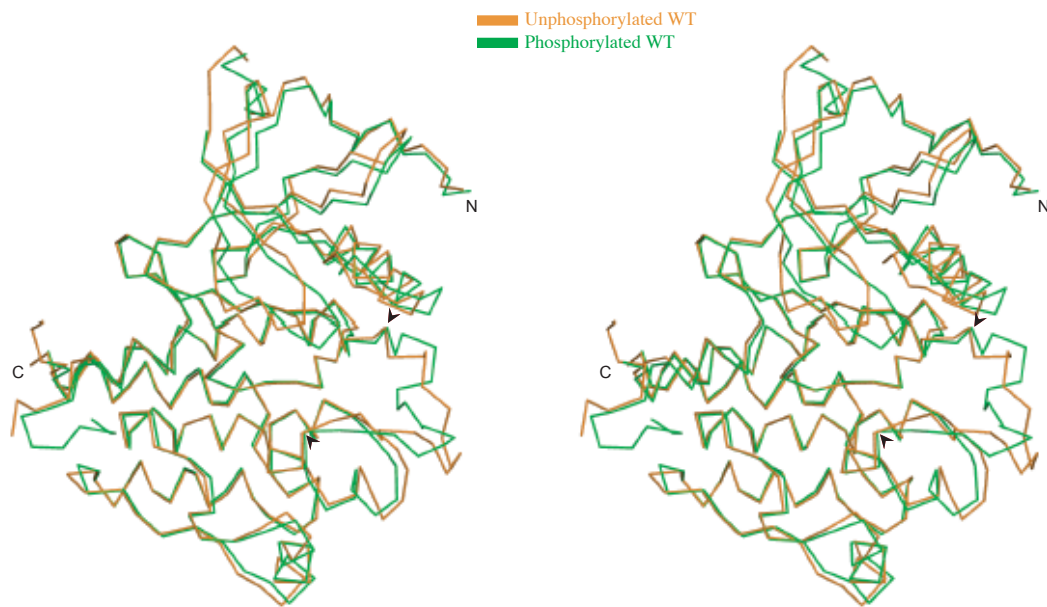

**B**

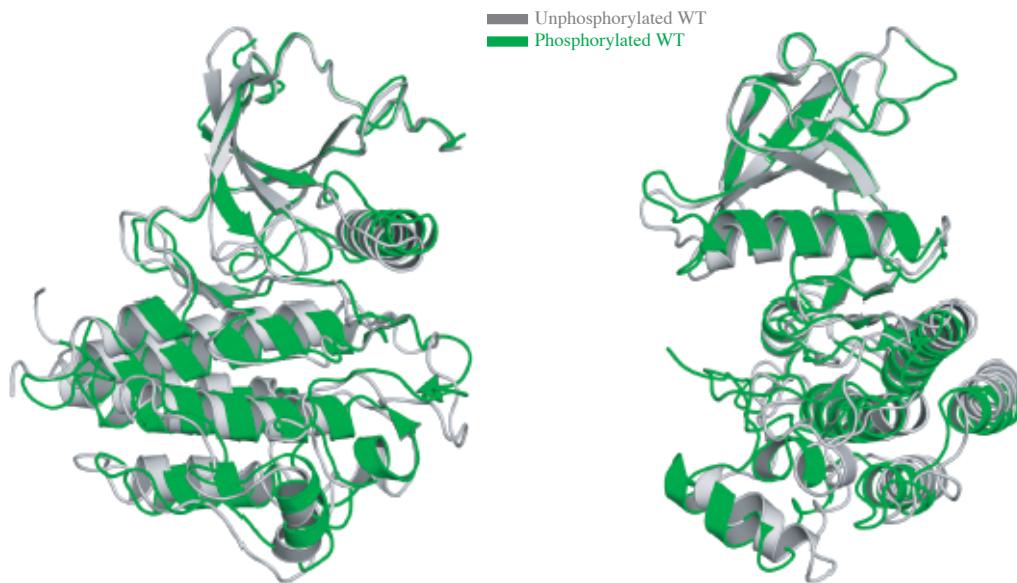

**C**

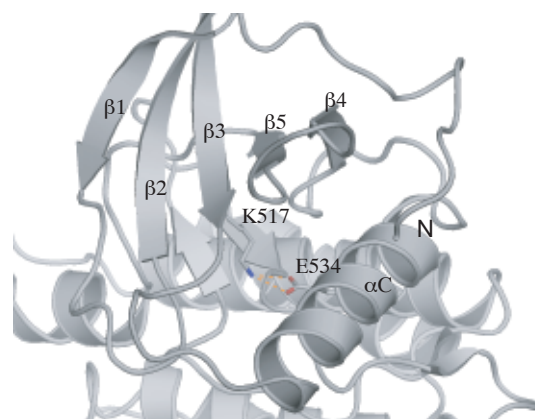

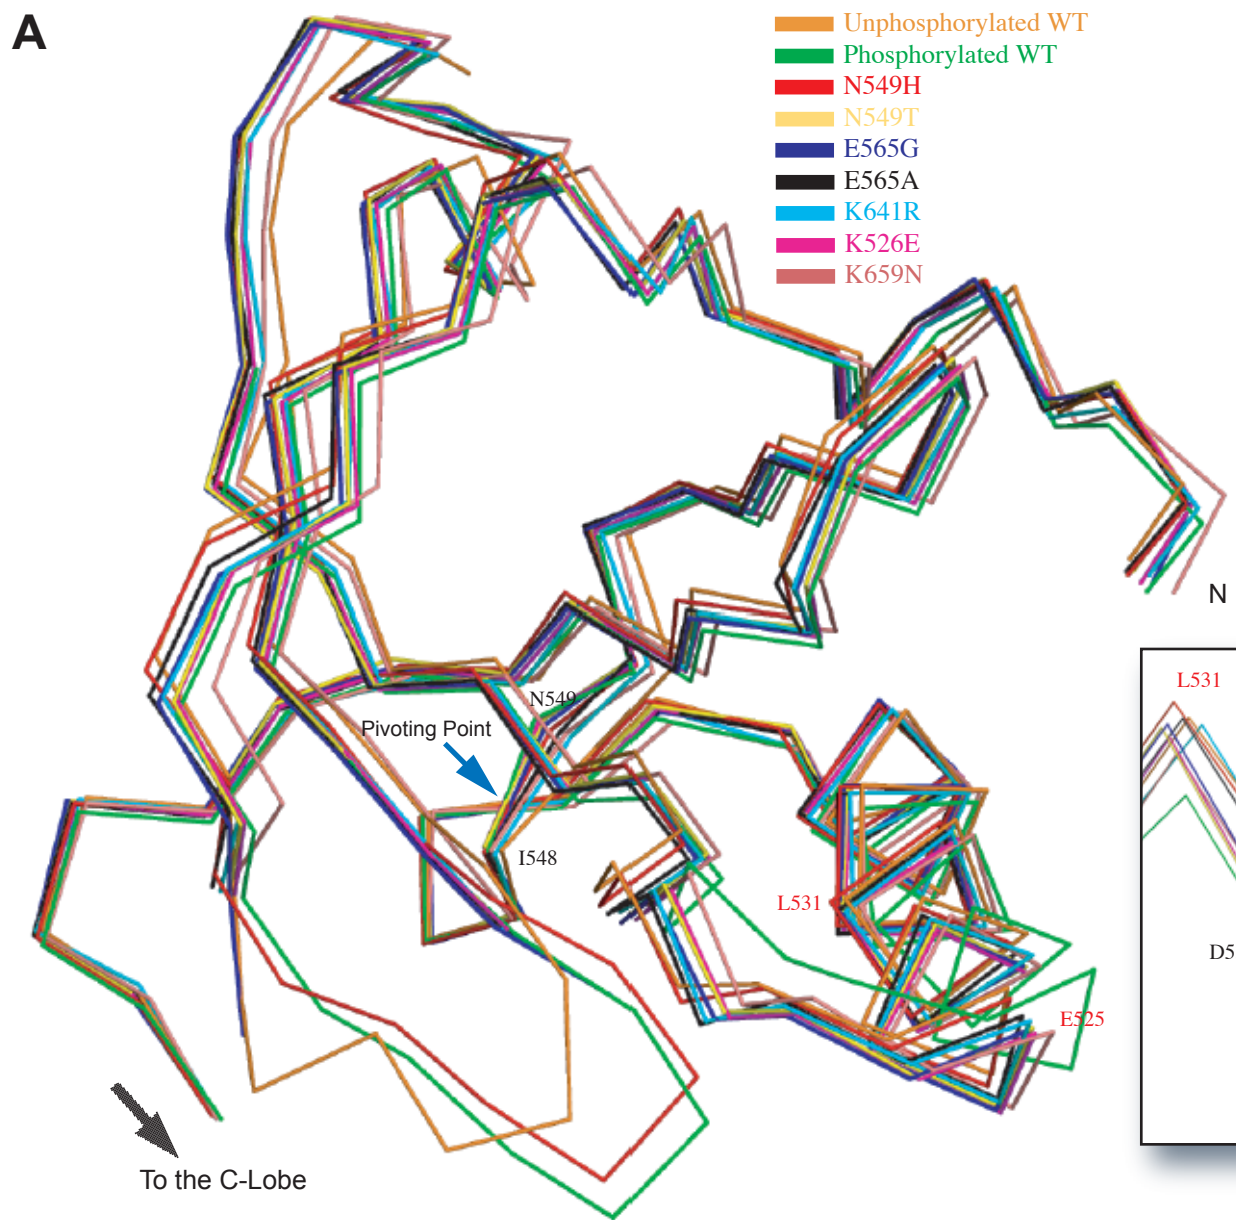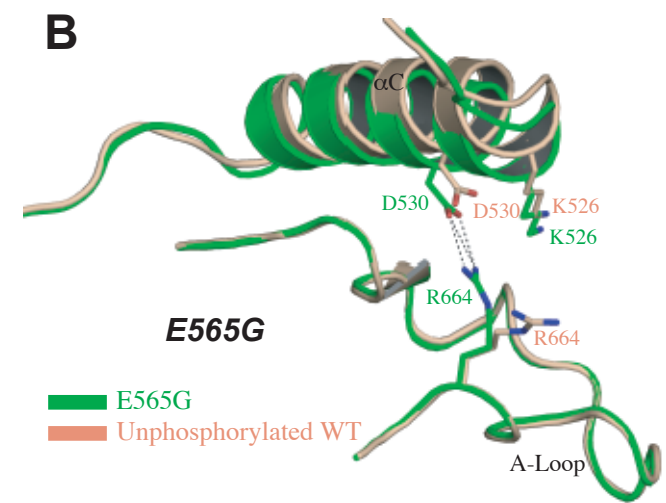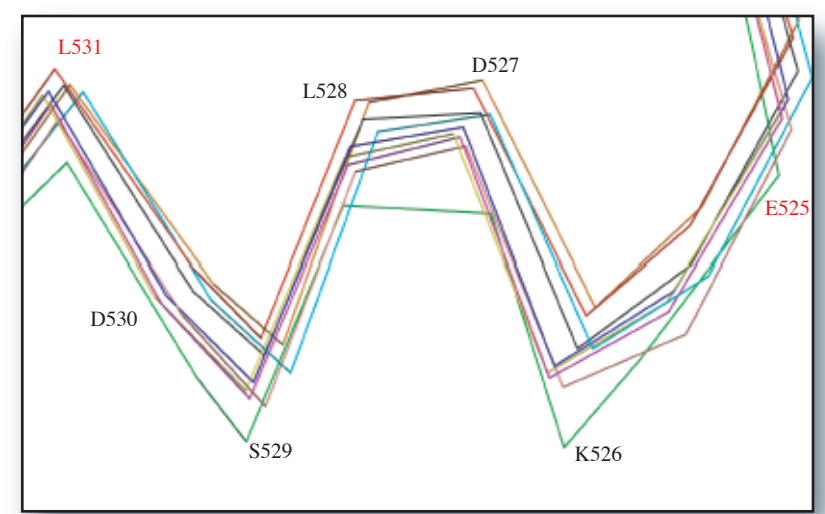

Chen *et al.*  
Figure S3

F) Supplemental Figure 4

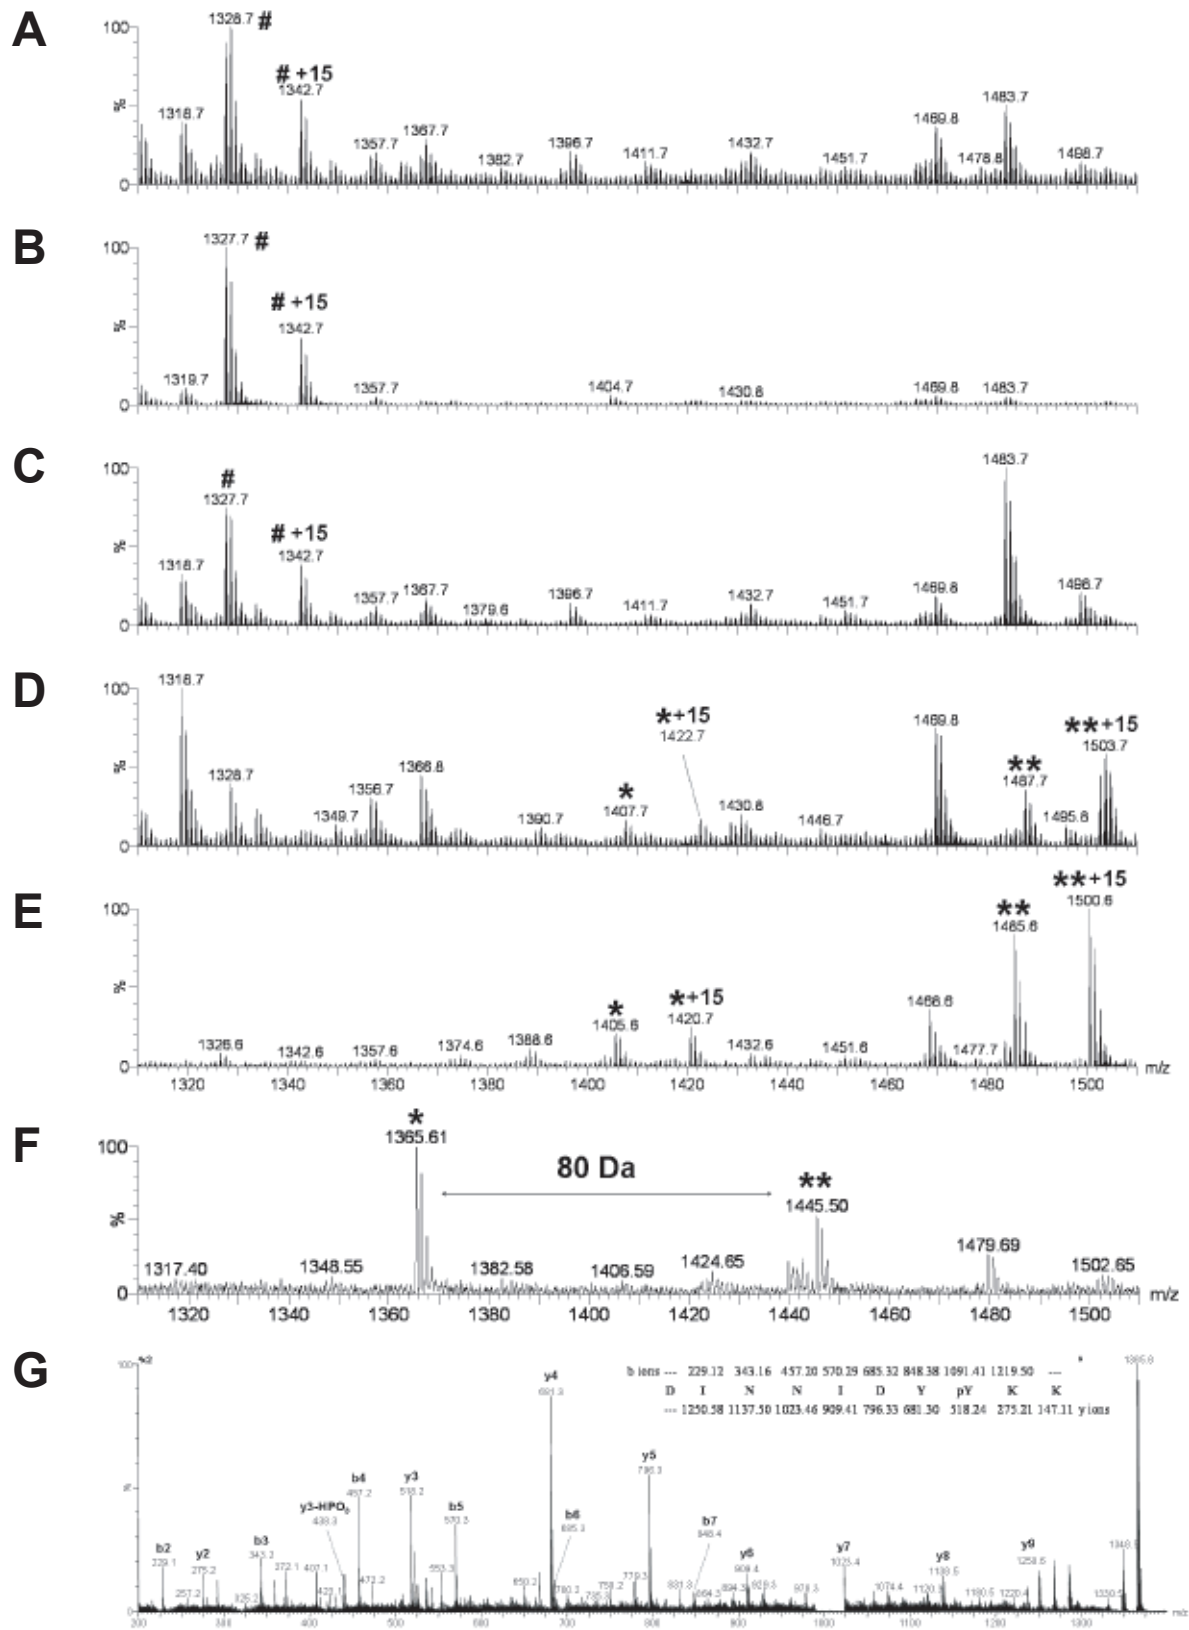

Chen *et al.*  
Figure S4

Unphos. WT

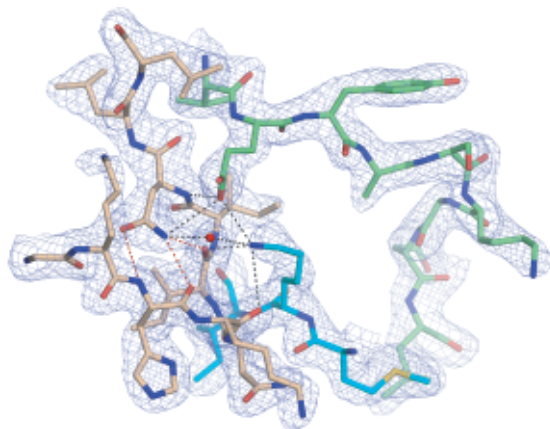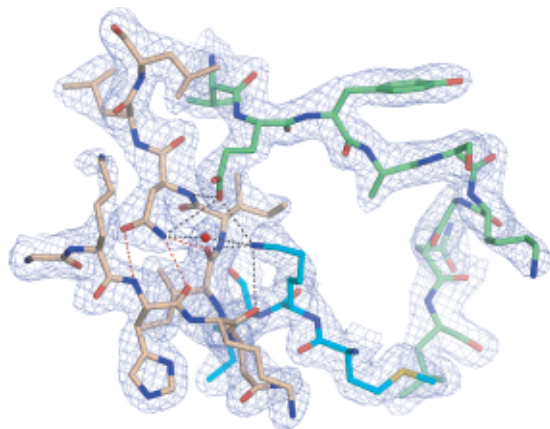

Phos. WT

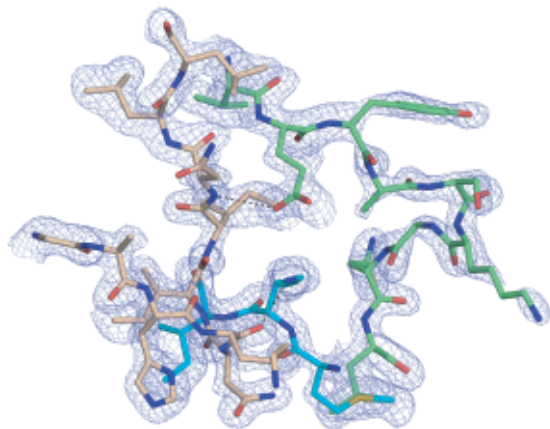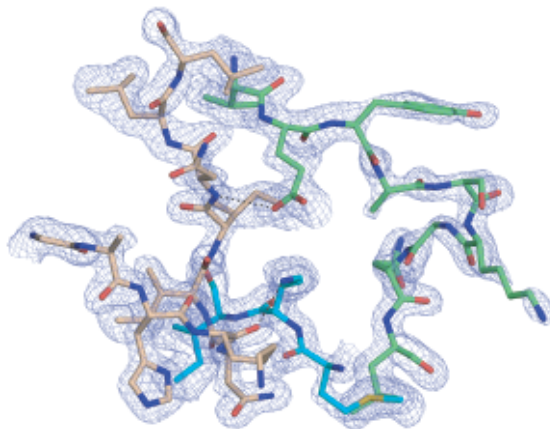

N549H Mutant

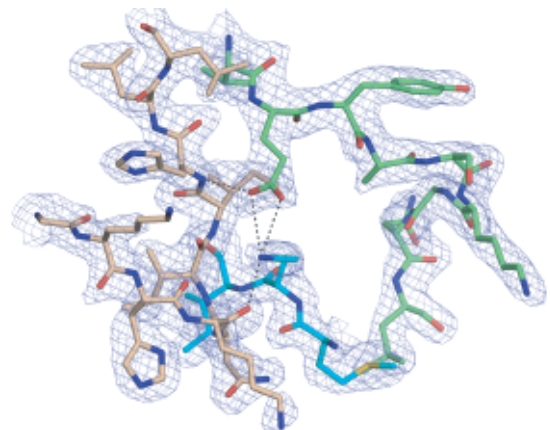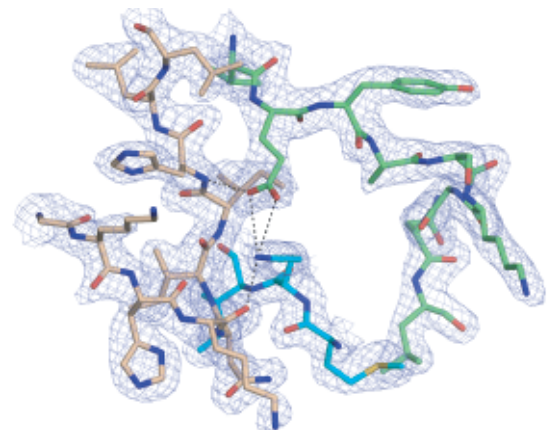

N549T Mutant

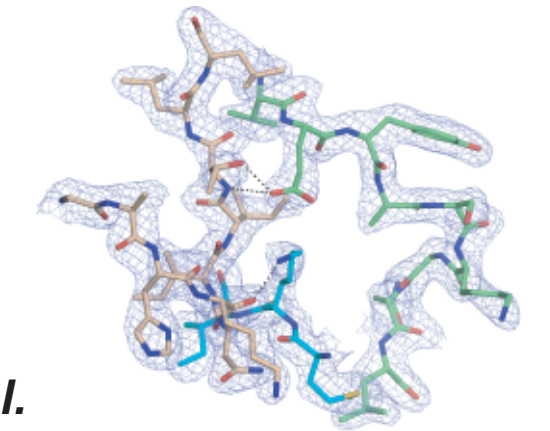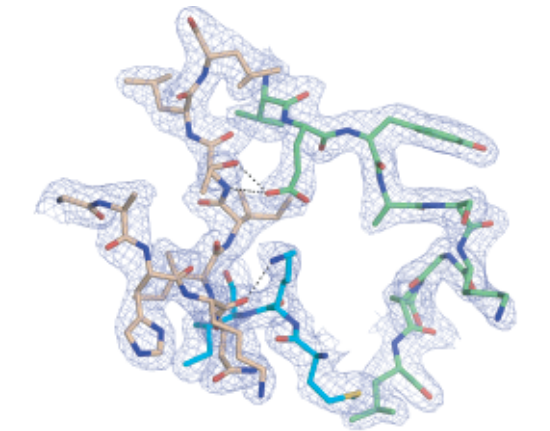

**Chen et al.**  
**Figure S5**

E565G Mutant

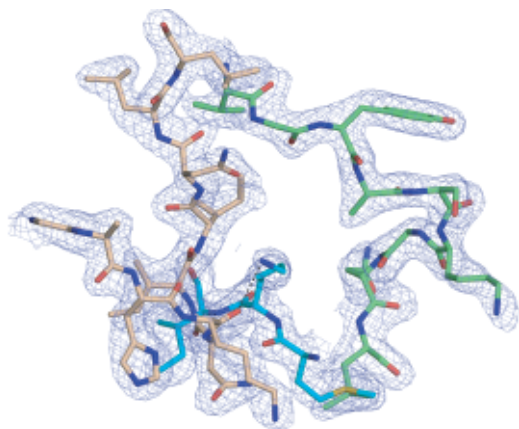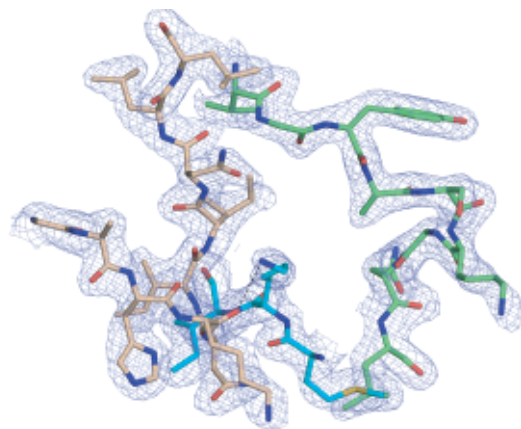

E565A Mutant

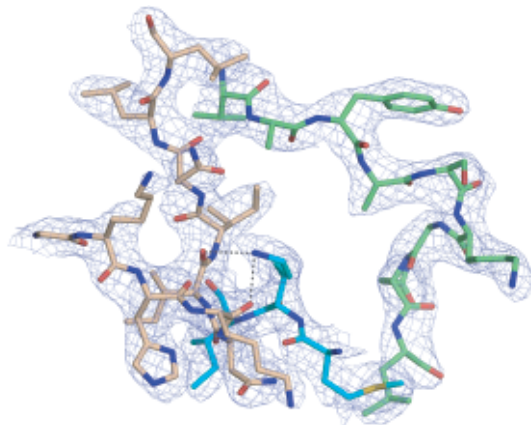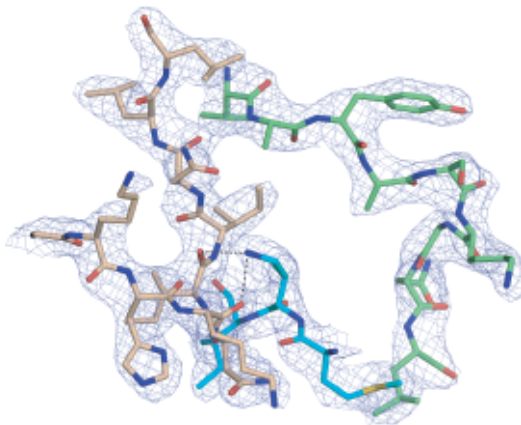

K641R Mutant

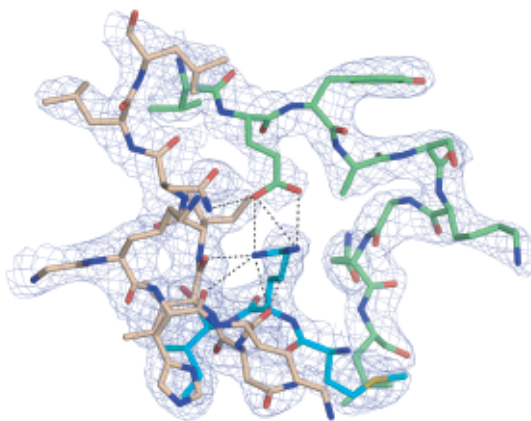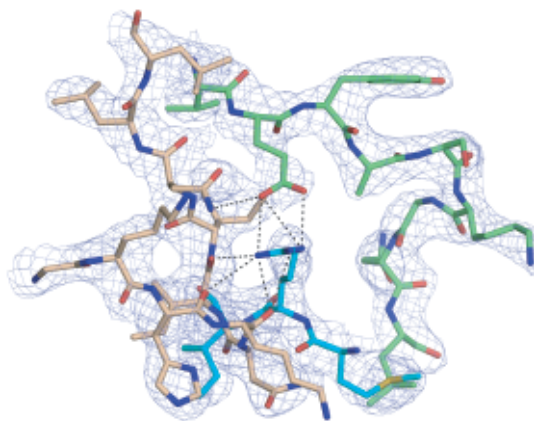

K526E Mutant

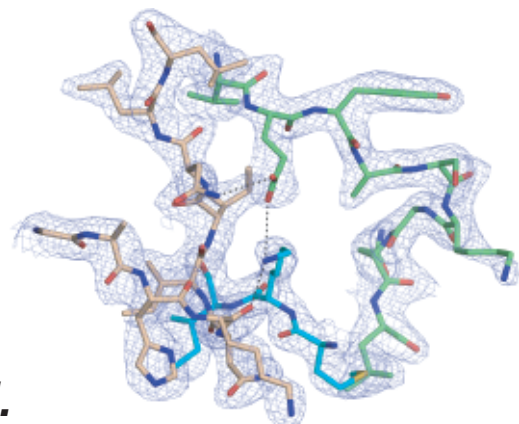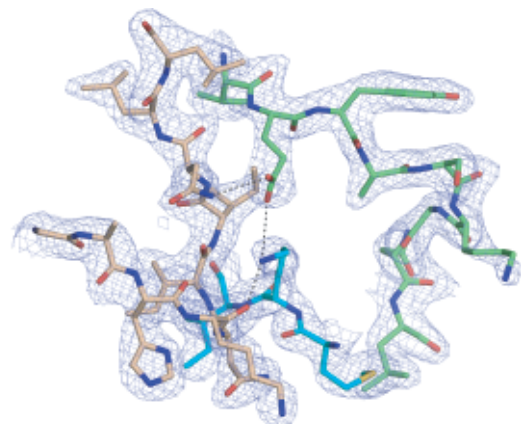

**Chen *et al.***  
**Figure S5 (cont.)**

K659N Mutant

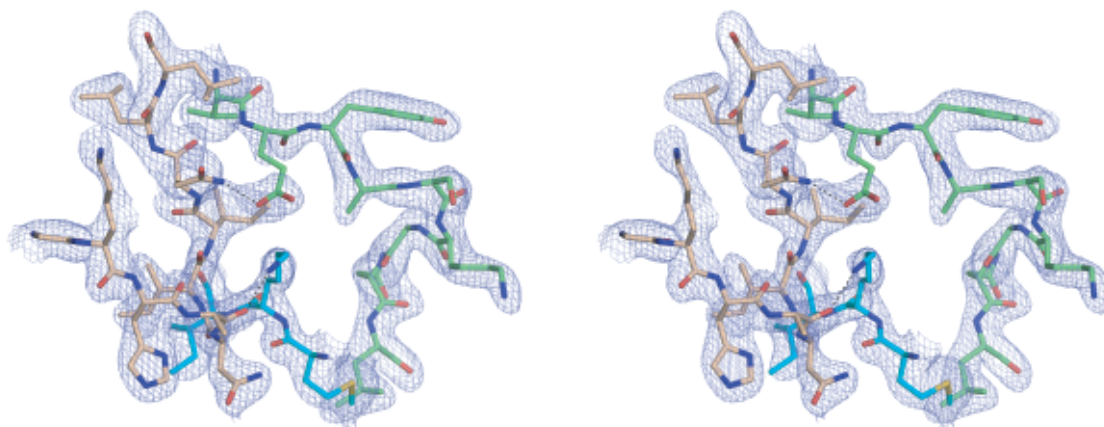

**Chen *et al.***  
**Figure S5 (cont.)**

F) Supplemental Figure 6

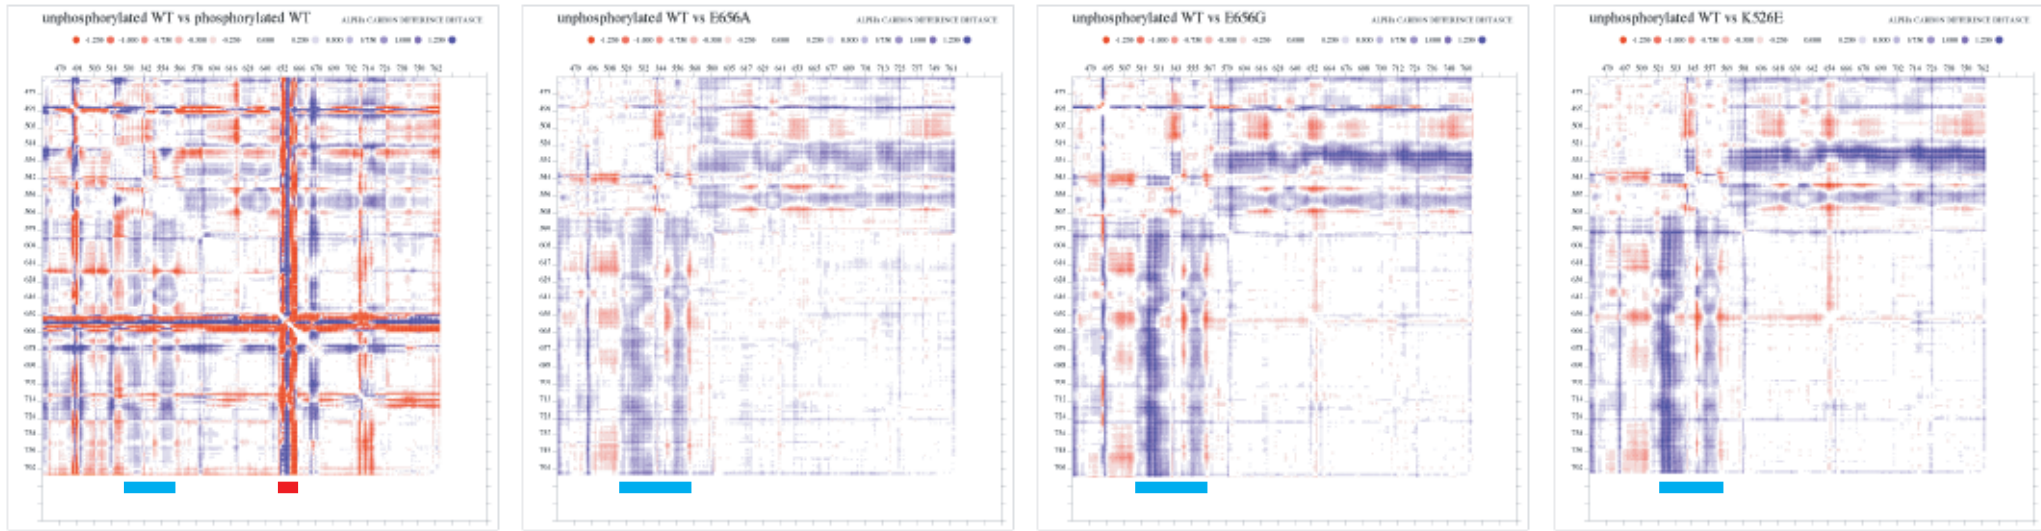

Residue 652 to 664 of the A-loop

Residue 520 to 568 consisting of the  $\beta$ 3- $\alpha$ C loop,  $\alpha$ C helix,  $\alpha$ C- $\beta$ 4 loop,  $\beta$ 4 strand,  $\beta$ 4- $\beta$ 5 loop,  $\beta$ 5 strand and the first three residues of the kinase hinge

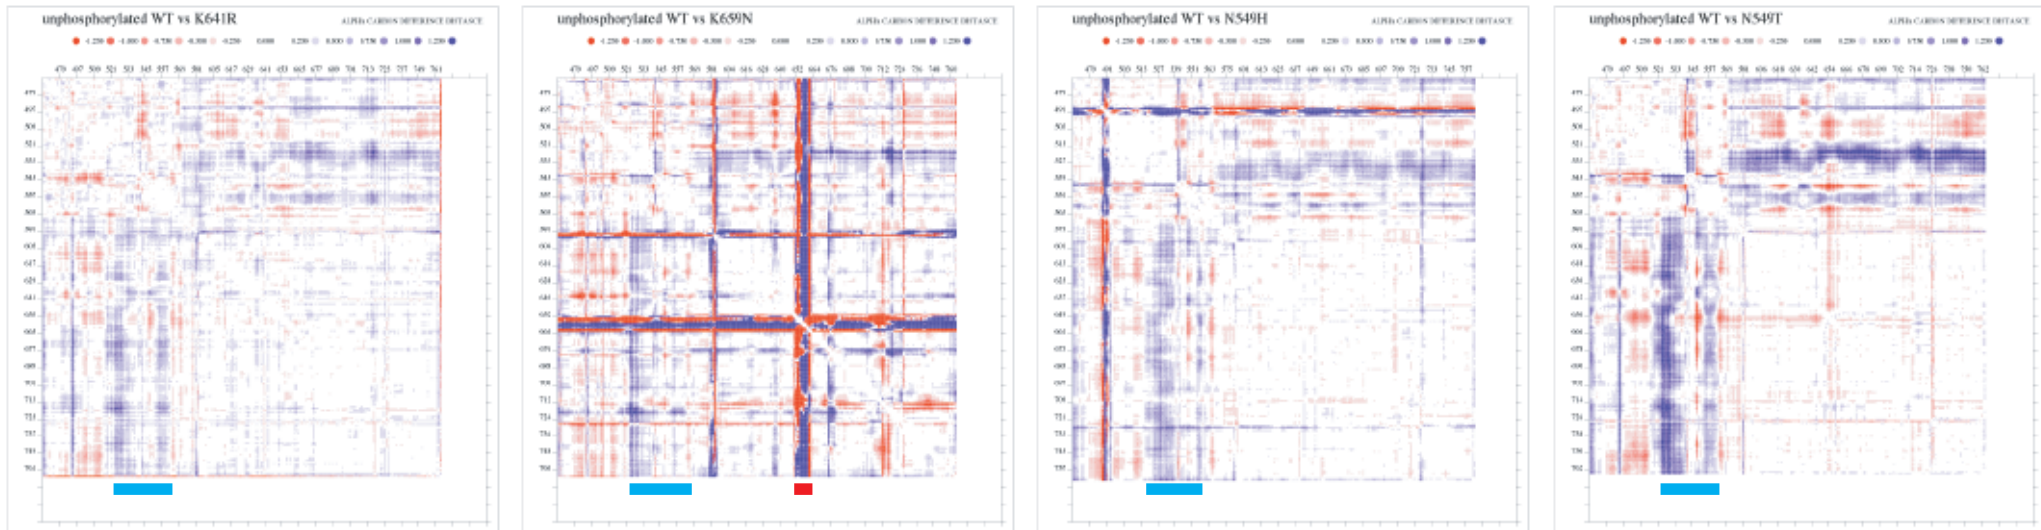

Chen *et al.*  
Figure S6
